# Supplementary material
Source: PubMed Central journal article supplement (PMC9926198)
Supplement: mmc1.pdf [file mmc1.pdf]

iScience, Volume 26

## **Supplemental information**

### **Omicron mutations increase interdomain interactions and reduce epitope exposure in the SARS-CoV-2 spike**

**Miłosz Wiczór, Phu K. Tang, Modesto Orozco, and Pilar Cossio**

## Supplementary Figures

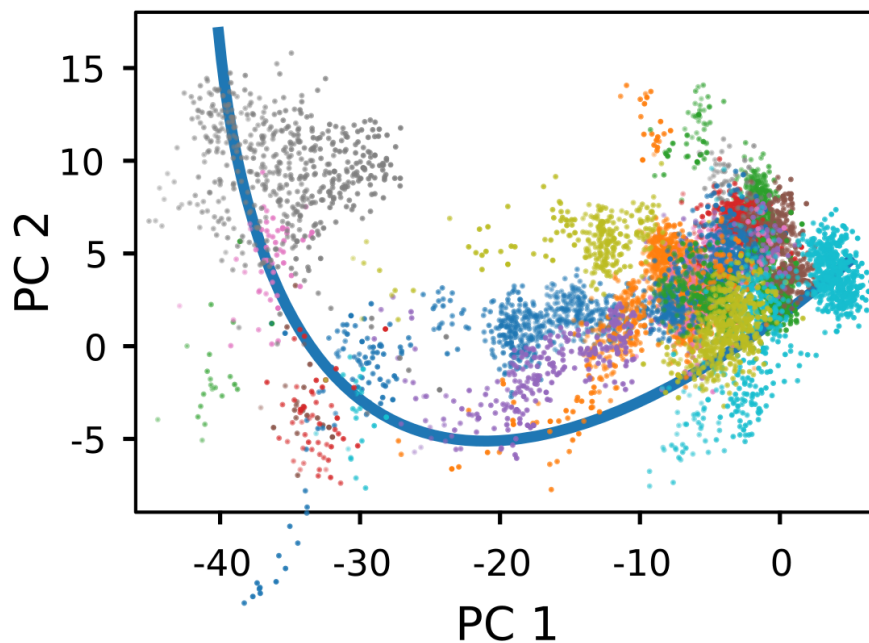

Supplementary Figure 1: **PCA projection of the initial ensemble of trajectories used to define the seeding structures for string-based pathway optimization, related to Figure 2.** Included are 1-up trajectories from RIKEN<sup>1</sup> and DE Shaw Research,<sup>2</sup> as well as transition pathways sampled by us (4 200-ns steered MD simulations) and Amaro's group (Weighted Ensemble simulations featuring the extreme opening in blue).<sup>3</sup> The blue line represents the initial trajectory in the PC space resulting from parametric spline interpolation of the data points.

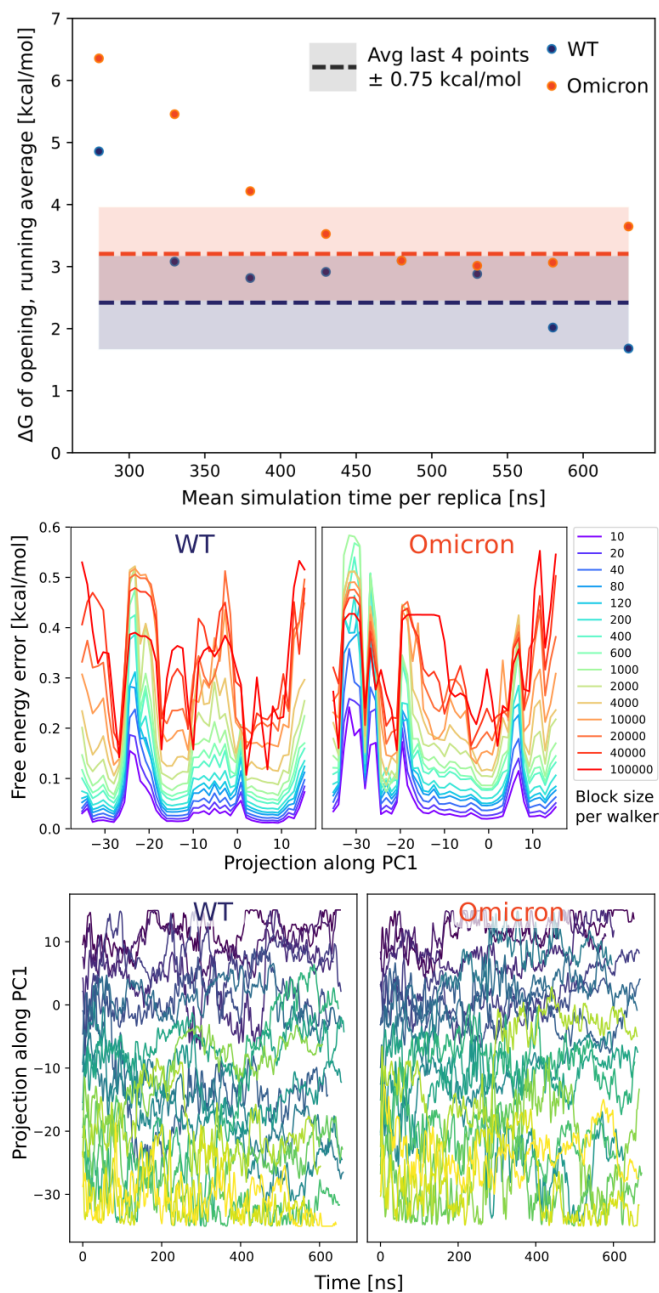

Supplementary Figure 2: **Assessing the convergence of the free energy calculations, related to Figure 2.** Top: Convergence of the multiple walker well-tempered metadynamics. Shown are running average values of the opening free energy, averaged over the previous 150 ns per-replica (e.g. the value for 630 ns corresponds to an average from 480 to 630 ns per replica). The free energy profile in Fig. 2 corresponds to the rightmost data point. Middle: Error in the free energy estimate along PC1 calculated from block averaging. The calculation was performed using dynamically calculated weights, as introduced in <sup>4</sup>. Prior to block averaging, data from individual walkers was combined and sorted by simulation time. Bottom: Time evolution of the PC1 projection for individual walkers (a total of 18 per system), Gaussian-smoothed to enhance visibility of individual trajectories.

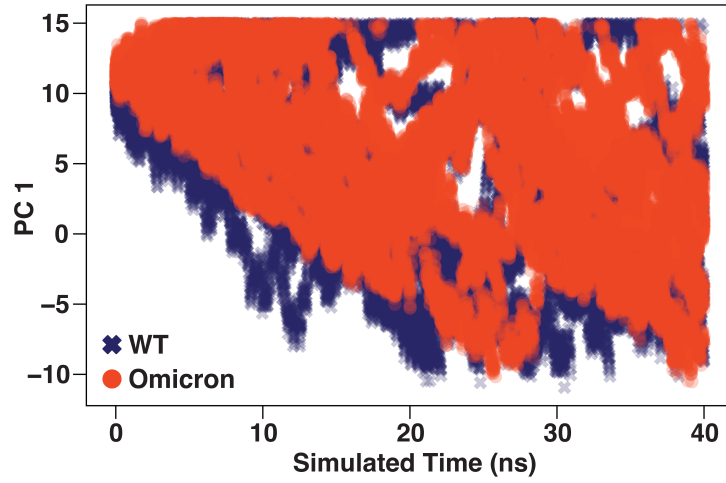

Supplementary Figure 3: **Extreme biasing MetaD simulations for WT and Omicron RBD opening, related to Figure 3.** PC 1 as a function of time for 15 conventional MetaD simulations starting from the 3-down conformation (PC 1=10) and biasing PC 1 for WT (crosses) and Omicron (circles).

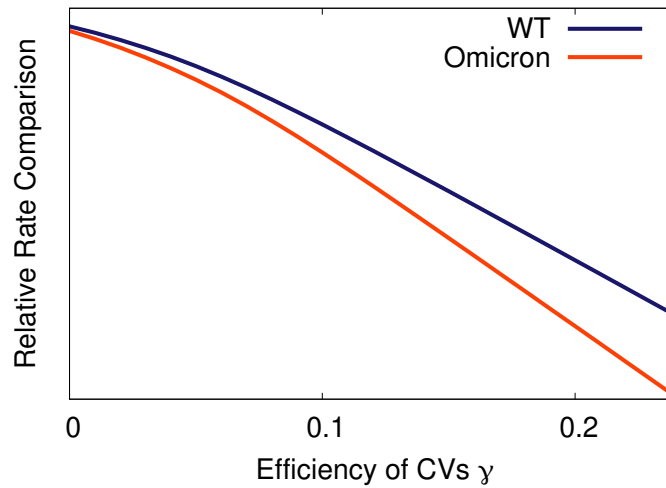

Supplementary Figure 4: **Relative rates of RBD opening between WT and Omicron, related to Figure 3.** WT (blue) and Omicron (orange) relative transition rate comparison as a function of the efficiency of CVs parameter  $\gamma$  given by Eq. S16 from the Supplementary Information of ref.<sup>5</sup> Because these simulations are performed under extreme biasing conditions, it is not possible to determine the exact value of the rate or  $\gamma$  but only compare  $k_0^*(\gamma)$ .

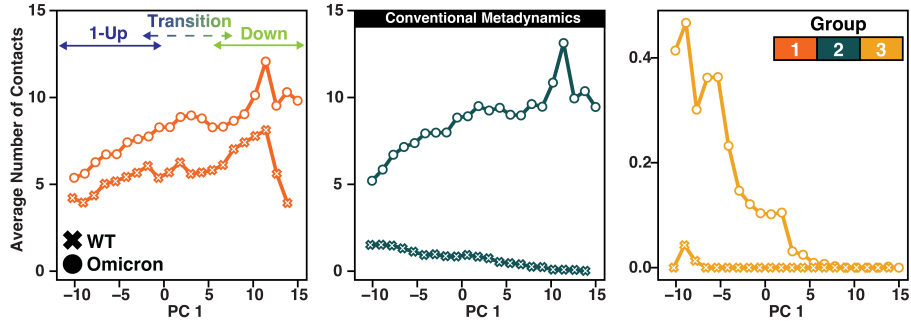

Supplementary Figure 5: **Average number of contacts profile from conventional metadynamics, related to Figure 4.** Average number of contacts formed by 371, 373 and 375 with groups 1, 2 and 3 (defined in Figure 1 Main Text) for the overbiasing MetaD opening simulations as a function of PC1 for WT (crosses) and Omicron (circles).

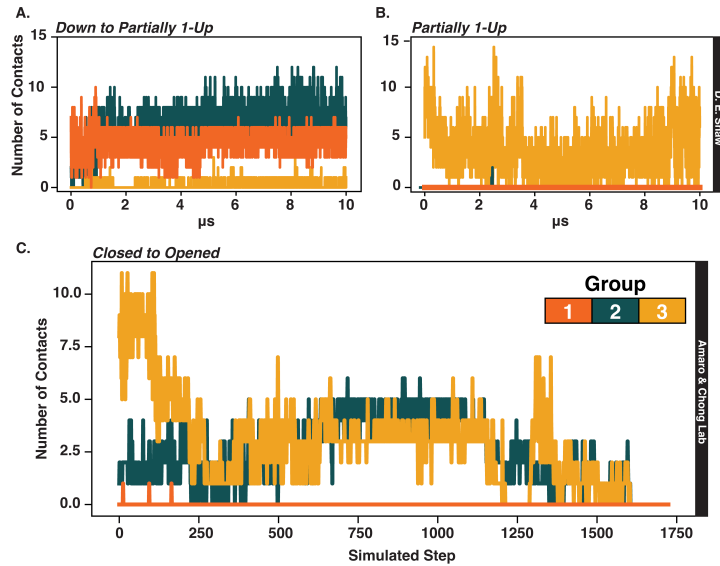

Supplementary Figure 6: **Average number of contacts profile from in-house and public data, related to Figure 4.** Average number of contacts over time formed by 371, 373 and 375 with groups 1, 2 and 3 (defined in Figure 1 Main Text) for the WT Spike from **A.** in-house unbiased simulations **B.** Amaro and Chong Lab<sup>3</sup> **C.** D.E. Shaw<sup>2</sup> .

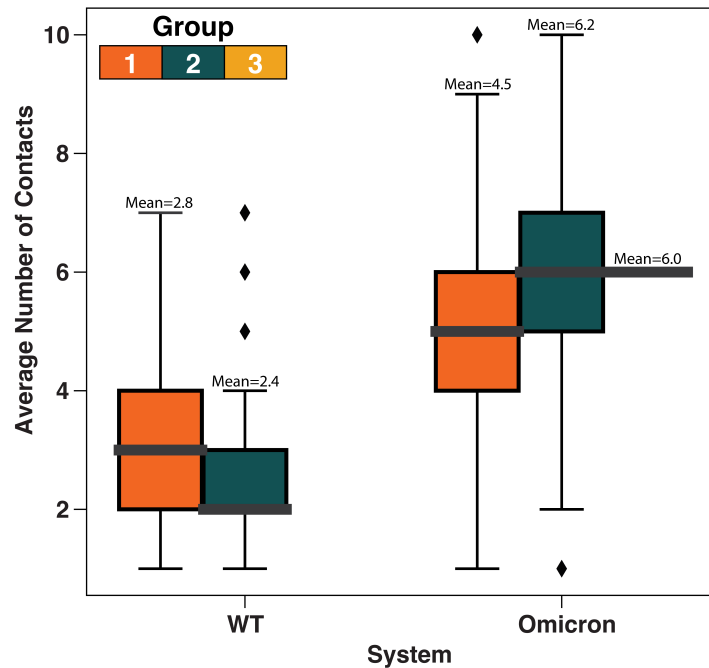

Supplementary Figure 7: **Average number of contacts profile for unbiased MD simulations, related to Figure 4.** Average number of contacts formed by 371, 373 and 375 with groups 1, 2 and 3 (defined in Figure 1 Main Text) for unbiased MD simulations starting in the down state for WT and Omicron, which ran for 500 ns. The grey lines are medians. The diamonds are outliers.

|                          | 358                   | 378 |
|--------------------------|-----------------------|-----|
| Wuhan-Hu-1               | ISNCVADYSVLYNSASFSTFK |     |
| BA.1   NCBI   UFO69279.1 | ISNCVADYSVLYNLAPFFTFK |     |
| BA.2   7XIX              | ISNCVADYSVLYNFAPFFAFK |     |
| BA.3   7XIY              | ISNCVADYSVLYNFAPFFTFK |     |
| BA.4   7XNQ              | ISNCVADYSVLYNFAPFFAFK |     |
| BA.5   NCBI   UOZ45804.1 | ISNCVADYSVLYNFAPFFAFK |     |

Supplementary Figure 8: **Mutation trend among COVID-19 variants, related to Figure 5.** Sequence alignment of SARS-CoV-2 Omicron subvariants from BA.1 to BA.5 from residues 358 to 378 against the Wuhan-Hu-1 (WT). WT residues S371, S373, S375 are highlighted in green. These residues are mutated to bulkier and more hydrophobic ones (red highlighted).

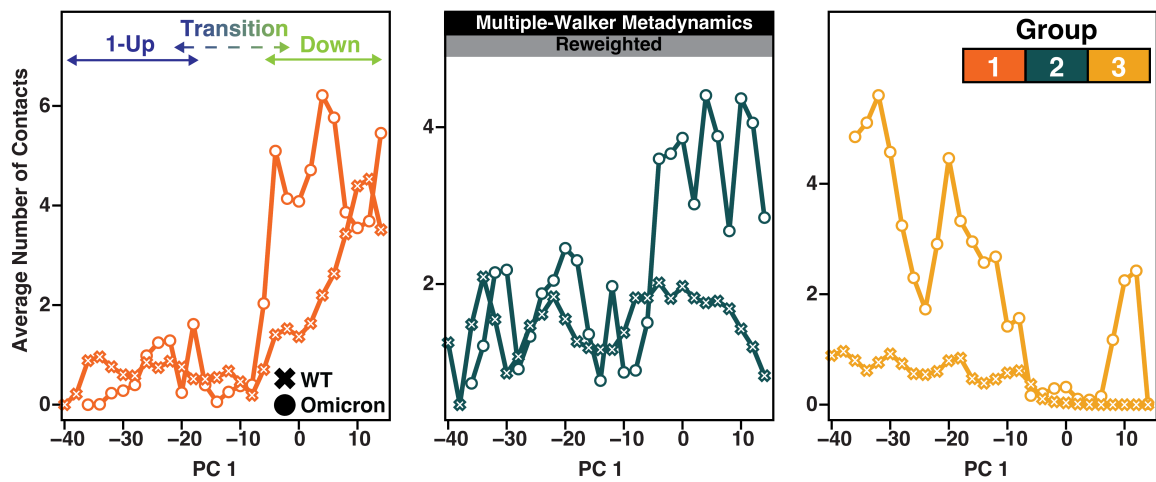

Supplementary Figure 9: **Group-wise decomposition of average contact numbers in multiple-walker metadynamics simulations, related to Figure 4.** The plot is analogous to Figure 4, but here the within-bin averaging has been performed according to weights dependent on the free energy along PC2 (see Methods).

## Supplementary Tables

| VARIANT | PDB ID | REFERENCE                                                     | Neighboring RBM in contact with 371 373 375 (heavy atom <10 Å) |
|---------|--------|---------------------------------------------------------------|----------------------------------------------------------------|
| WT      | 6VSB   | Wrapp, D., et al (2020) Science 367: 1260-1263                | Neighboring RBM not resolved                                   |
|         | 6XM3   | Zhou, T., et al (2020) Cell Host Microbe 28: 867-879.e5       | Yes                                                            |
|         | 6XM0   | Zhou, T., et al (2020) Cell Host Microbe 28: 867-879.e5       | Yes                                                            |
|         | 6XM4   | Zhou, T., et al (2020) Cell Host Microbe 28: 867-879.e5       | Yes                                                            |
|         | 6Z97   | Huo, J et al. (2020) Cell Host Microbe 28: 445-454.e6         | Yes                                                            |
|         | 7DDN   | Zhang C (2021) Nat Commun 12: 264-264                         | No                                                             |
|         | 7AD1   | Juraszek J (2021) Nat Commun 12: 244-244                      | No                                                             |
|         | 7DZW   | Liu Y (2021) Cell 184: 3452-3466.e18                          | Yes                                                            |
|         | 6ZGG   | Wrobel (2020) Nat Struct Mol Biol 27: 763-767                 | Yes                                                            |
| OMICRON | 7WK9   | Hong, Q., Han, W., Li, J. et al. Nature 604, 546–552 (2022).  | Yes                                                            |
|         | 7WK3   | To be published.                                              | Yes                                                            |
|         | 7TGW   | Ye, G et al (2022) Nat Commun 13: 1214-1214                   | Yes                                                            |
|         | 7WVN   | Hong, Q., Han, W., Li, J. et al. Nature 604, 546–552 (2022).  | Yes                                                            |
|         | 7WVO   | Hong, Q., Han, W., Li, J. et al. Nature 604, 546–552 (2022).  | Yes                                                            |
|         | 7TGX   | Ye, G et al (2022) Nat Commun 13: 1214-1214                   | Yes                                                            |
|         | 7TL9   | Gobeil, S.M., et al. (2022) Biorxiv DOI:                      | Yes                                                            |
|         | 7TEI   | Gobeil, S.M., et al. (2022) Biorxiv DOI:                      | Yes                                                            |
|         | 7TB4   | Wang, L., et al (2021) Biorxiv DOI: 10.1101/2021.02.25.432969 | Yes                                                            |
| Mink    | 7R1B   | Wrobel, A.G. et al. (2022) Nat Commun 13: 1178-1178           | Yes                                                            |
| D614G   | 7EB3   | Yang et al. (2021) J Biol Chem 297: 101238-101238             | Yes                                                            |
|         | 7EB0   | Yang et al. (2021) J Biol Chem 297: 101238-101238             | Yes                                                            |
|         | 7KEA   | Gobeil. (2021) Cell Rep 34: 108630-108630                     | Neighboring RBM not resolved                                   |
|         | 7KE9   | Gobeil. (2021) Cell Rep 34: 108630-108630                     | Neighboring RBM not resolved                                   |
|         | 7KDL   | Gobeil. (2021) Cell Rep 34: 108630-108630                     | Neighboring RBM not resolved                                   |
|         | 7KDJ   | Gobeil. (2021) Cell Rep 34: 108630-108630                     | Neighboring RBM not resolved                                   |
| Kappa   | 7VXI   | Wang Y (2021) Nat Commun 12: 7345-7345                        | Yes                                                            |
|         | 7VXE   | Wang Y (2021) Nat Commun 12: 7345-7345                        | Yes                                                            |

Supplementary Table 1: **Structural analysis of Spike PDBs in the 1-up conformation, related to Figure 1** Table showing the PDB ID, Variant, reference, and whether residues 371, 373, 375 are in contact with the neighboring RBM. A contact is made if any pair of heavy atoms come within less than 10 Å of each other. Green rows correspond to structures where the interaction is formed, red rows – not formed, and grey rows indicate structures in which the RBM has not been resolved experimentally.



## References

- (1) Mori, T., Jung, J., Kobayashi, C., Dokainish, H. M., Re, S., and Sugita, Y. (2021). Elucidation of interactions regulating conformational stability and dynamics of SARS-CoV-2 S-protein. *Biophysical journal*, 120, 1060–1071.
- (2) D. E. Shaw Research (2020). *Molecular Dynamics Simulations Related to SARS-CoV-2*. D. E. Shaw Research Technical Data.
- (3) Sztain, T., Ahn, S.-H., Bogetti, A. T., Casalino, L., Goldsmith, J. A., Seitz, E., McCool, R. S., Kearns, F. L., Acosta-Reyes, F., Maji, S., et al. (2021). A glycan gate controls opening of the SARS-CoV-2 spike protein. *Nature Chemistry*, 13, 963–968.
- (4) Tiwary, P. and Parrinello, M. (2015). A time-independent free energy estimator for metadynamics. *Journal of Physical Chemistry B*, 119, 736–742. ISSN 15205207.
- (5) Palacio-Rodriguez, K., Vroylandt, H., Stelzl, L. S., Pietrucci, F., Hummer, G., and Cossio, P. (2022). Transition Rates and Efficiency of Collective Variables from Time-Dependent Biased Simulations. *The Journal of Physical Chemistry Letters*, 13, 7490–7496.
